# Supplementary material for: Spread of the florfenicol resistance floR gene among clinical Klebsiella pneumoniae isolates in China
Source: Springer Nature journal article supplement (doi:10.1186/s13756-018-0415-0), 2018-11-01
Supplement: MOESM1 [file 16244414]

Supplementary table 1 Grouping of 105 *floR* gene containing sequences and their origins

| Accession number | Group | Cluster | Bacteria                         | Location   |
|------------------|-------|---------|----------------------------------|------------|
| KY082186         | G1a   | 1       | <i>Klebsiella pneumoniae</i>     | plasmid    |
| KT282968.1       | G1b   | 2       | <i>Escherichia coli</i>          | plasmid    |
| KT151662.1       | G2a   | 4       | <i>Vibrio cholerae</i>           | chromosome |
| KJ817376.1       | G2a   | 4       | <i>Vibrio cholerae</i>           | chromosome |
| KT151654.1       | G2a   | 4       | <i>Vibrio cholerae</i>           | chromosome |
| KT151656.1       | G2a   | 4       | <i>Vibrio cholerae</i>           | chromosome |
| KT151657.1       | G2a   | 4       | <i>Vibrio cholerae</i>           | chromosome |
| KT151658.1       | G2a   | 4       | <i>Vibrio cholerae</i>           | chromosome |
| KT151659.1       | G2a   | 4       | <i>Vibrio cholerae</i>           | chromosome |
| KT151661.1       | G2a   | 4       | <i>Vibrio cholerae</i>           | chromosome |
| KT151655.1       | G2a   | 4       | <i>Vibrio cholerae</i>           | chromosome |
| KR091911.1       | G2a   | 7       | <i>Salmonella enterica</i>       | plasmid    |
| CP007137.1       | G2a   | 7       | <i>Escherichia coli</i>          | plasmid    |
| CP006029.1       | G2a   | 7       | <i>Escherichia coli</i>          | plasmid    |
| CP009413.2       | G2a   | 7       | <i>Salmonella enterica</i>       | plasmid    |
| JN983043.1       | G2a   | 7       | <i>Salmonella enterica</i>       | plasmid    |
| CP009567.1       | G2a   | 7       | <i>Salmonella enterica</i>       | plasmid    |
| CP009570.1       | G2a   | 7       | <i>Salmonella enterica</i>       | plasmid    |
| AB571791.1       | G2a   | 7       | <i>Salmonella enterica</i>       | chromosome |
| AP014565.1       | G2a   | 7       | <i>Salmonella enterica</i>       | chromosome |
| CP012682.1       | G2a   | 7       | <i>Salmonella enterica</i>       | plasmid    |
| CP006641.1       | G2a   | 8       | <i>Escherichia coli</i>          | plasmid    |
| KF787110.1       | G2a   | 8       | <i>Escherichia coli</i>          | plasmid    |
| CP009042.1       | G2a   | 10      | <i>Vibrio cholerae</i>           | chromosome |
| KJ909292.1       | G2a   | 10      | <i>Aeromonas salmonicida</i>     | plasmid    |
| GQ463139.1       | G2a   | 10      | <i>Providencia alcalifaciens</i> | chromosome |
| GQ463140.1       | G2a   | 10      | <i>Vibrio cholerae</i>           | chromosome |
| AB114188.1       | G2a   | 10      | <i>Vibrio cholerae</i>           | chromosome |
| GQ463141.1       | G2a   | 10      | <i>Vibrio cholerae</i>           | chromosome |
| GQ463142.1       | G2a   | 10      | <i>Vibrio cholerae</i>           | chromosome |
| AB535680.1       | G2a   | 10      | <i>Vibrio cholerae</i>           | chromosome |
| CP003069.1       | G2a   | 10      | <i>Vibrio cholerae</i>           | chromosome |
| CP007634.1       | G2a   | 10      | <i>Vibrio cholerae</i>           | chromosome |
| AY034138.1       | G2a   | 10      | <i>Vibrio cholerae</i>           | chromosome |
| JN648379.1       | G2a   | 10      | <i>Vibrio cholerae</i>           | chromosome |
| KC886257.1       | G2a   | 10      | <i>Vibrio cholerae</i>           | chromosome |
| AY055428.1       | G2a   | 10      | <i>Vibrio cholerae</i>           | chromosome |
| KC886258.1       | G2a   | 10      | <i>Vibrio cholerae</i>           | chromosome |
| CP009414.2       | G2a   | 11      | <i>Salmonella enterica</i>       | plasmid    |
| KJ909290.1       | G2a   | 11      | <i>Aeromonas salmonicida</i>     | plasmid    |
| KC853434.1       | G2a   | 11      | <i>Escherichia coli</i>          | plasmid    |
| HQ023863.1       | G2a   | 11      | <i>Escherichia coli</i>          | plasmid    |

|             |     |    |                               |            |
|-------------|-----|----|-------------------------------|------------|
| FJ621588.1  | G2a | 11 | <i>Escherichia coli</i>       | plasmid    |
| FJ621586.1  | G2a | 11 | <i>Escherichia coli</i>       | plasmid    |
| HQ023861.1  | G2a | 11 | <i>Escherichia coli</i>       | plasmid    |
| KP056256.1  | G2a | 11 | <i>Escherichia coli</i>       | plasmid    |
| HQ023862.1  | G2a | 11 | <i>Escherichia coli</i>       | plasmid    |
| JX442976.1  | G2a | 11 | <i>Klebsiella pneumoniae</i>  | plasmid    |
| JN687470.1  | G2a | 11 | <i>Providencia stuartii</i>   | plasmid    |
| FJ621587.1  | G2a | 11 | <i>Salmonella enterica</i>    | plasmid    |
| CP009410.2  | G2a | 11 | <i>Salmonella enterica</i>    | plasmid    |
| CP009411.2  | G2a | 11 | <i>Salmonella enterica</i>    | plasmid    |
| CP009412.2  | G2a | 11 | <i>Salmonella enterica</i>    | plasmid    |
| JF267651.1  | G2a | 11 | <i>Salmonella enterica</i>    | plasmid    |
| JN983045.1  | G2a | 11 | <i>Salmonella enterica</i>    | plasmid    |
| JN983048.1  | G2a | 11 | <i>Salmonella enterica</i>    | plasmid    |
| CP009409.2  | G2a | 11 | <i>Salmonella enterica</i>    | plasmid    |
| CP009563.1  | G2a | 11 | <i>Salmonella enterica</i>    | plasmid    |
| CP009564.1  | G2a | 11 | <i>Salmonella enterica</i>    | plasmid    |
| CP009560.1  | G2a | 11 | <i>Salmonella enterica</i>    | plasmid    |
| CP009562.1  | G2a | 11 | <i>Salmonella enterica</i>    | plasmid    |
| CP000604.1  | G2a | 11 | <i>Salmonella enterica</i>    | plasmid    |
| AB591424.1  | G2a | 11 | <i>Salmonella enterica</i>    | plasmid    |
| CP011429.1  | G2a | 11 | <i>Salmonella enterica</i>    | plasmid    |
| CP007636.1  | G2a | 11 | <i>Vibrio cholerae</i>        | plasmid    |
| BK008853.1  | G2a | 16 | <i>TPA_inf: Aeromonas</i>     | plasmid    |
| EF495198.1  | G2a | 16 | <i>Aeromonas bestiarum</i>    | plasmid    |
| LN735558.1  | G2b | 3  | <i>Escherichia coli</i>       | plasmid    |
| LN735561.1  | G2b | 3  | <i>Escherichia coli</i>       | plasmid    |
| LN735559.1  | G2b | 3  | <i>Escherichia coli</i>       | plasmid    |
| KM877269.1  | G2b | 6  | <i>Salmonella enterica</i>    | plasmid    |
| FJ012880.1  | G2b | 6  | <i>Uncultured bacterium</i>   | plasmid    |
| NG_035718.1 | G2b | 19 | <i>Escherichia coli</i>       | plasmid    |
| AB571865.1  | G2b | 22 | <i>Photobacterium damsela</i> | plasmid    |
| LC055503.1  | G3a | 9  | <i>Klebsiella pneumoniae</i>  | plasmid    |
| KF250428.1  | G3a | 9  | <i>Klebsiella pneumoniae</i>  | plasmid    |
| CP007592.1  | G3a | 12 | <i>Escherichia coli</i>       | chromosome |
| CP006955.1  | G3a | 17 | <i>Bibersteinia trehalosi</i> | plasmid    |
| CP003022.1  | G3a | 21 | <i>Pasteurella multocida</i>  | chromosome |
| CP003745.1  | G3b | 18 | <i>Bibersteinia trehalosi</i> | plasmid    |
| CP006956.1  | G3b | 20 | <i>Bibersteinia trehalosi</i> | chromosome |
| JQ010984.1  | G3b | 23 | <i>Klebsiella pneumoniae</i>  | plasmid    |
| KP276584.1  | G3b | 23 | <i>Escherichia coli</i>       | plasmid    |
| CP011374.1  | G4a | 15 | <i>Moraxella bovoculi</i>     | chromosome |
| CP006657.1  | G4a | 25 | <i>Klebsiella pneumoniae</i>  | plasmid    |
| CP003225.1  | G4a | 25 | <i>Klebsiella pneumoniae</i>  | plasmid    |

|            |     |    |                                     |            |
|------------|-----|----|-------------------------------------|------------|
| AP014651.1 | G4a | 25 | <i>Pseudomonas aeruginosa</i>       | chromosome |
| CT025832.1 | G4a | 27 | <i>Acinetobacter baumannii</i>      | chromosome |
| KM649682.1 | G4b | 5  | <i>Stenotrophomonas maltophilia</i> | chromosome |
| CP011649.1 | G4b | 13 | <i>Enterobacter cloacae</i>         | plasmid    |
| CP011580.1 | G4b | 13 | <i>Enterobacter cloacae</i>         | plasmid    |
| CP011583.1 | G4b | 14 | <i>Enterobacter cloacae</i>         | plasmid    |
| CP011571.1 | G4b | 14 | <i>Enterobacter cloacae</i>         | plasmid    |
| KM234279.1 | G4b | 24 | <i>Salmonella enterica</i>          | chromosome |
| KJ186152.1 | G4b | 24 | <i>Proteus mirabilis</i>            | chromosome |
| KJ186153.1 | G4b | 24 | <i>Proteus mirabilis</i>            | chromosome |
| JX121641.1 | G4b | 24 | <i>Proteus mirabilis</i>            | chromosome |
| JX121639.1 | G4b | 24 | <i>Proteus mirabilis</i>            | chromosome |
| GQ388247.1 | G4b | 24 | <i>Pseudomonas aeruginosa</i>       | chromosome |
| KJ463833.1 | G4b | 24 | <i>Pseudomonas aeruginosa</i>       | chromosome |
| AY963803.6 | G4b | 24 | <i>Salmonella enterica</i>          | chromosome |
| LN829403.1 | G4b | 24 | <i>Salmonella enterica</i>          | chromosome |
| AF261825.2 | G4b | 24 | <i>Salmonella enterica</i>          | chromosome |
| CP007581.1 | G4b | 24 | <i>Salmonella enterica</i>          | chromosome |
| CU459141.1 | G4b | 26 | <i>Acinetobacter baumannii</i>      | chromosome |

---
